# Supplementary material for: Synthesis of sub-5 nm Au–Ag alloy nanoparticles using bio-reducing agent in aqueous solution
Source: Royal Society of Chemistry journal article supplement (doi:10.1039/c1jm13120f), 2011-01-01
Supplement: c1jm13120f.pdf [file c1jm13120f.pdf]

## Electronic Supplementary Information

### 1. Experimental procedures

Materials: Ultrapure water was used in all of the experiments. Gold(III) acetate ( $\text{Au}(\text{ac})_3$  99.9%) was purchased from Alfa Aesar.  $\text{AgNO}_3$  of analytical grade was purchased from Sinopharm Chemical Reagents. NADPH (reduced  $\beta$ -nicotinamide adenine dinucleotide 2'-phosphate tetrasodium salt) was purchased from Biomol. The Amicon centrifugal filter units were purchased from Millipore.

Synthesis of Au-Ag Alloy Nanoparticles: 0.01 g  $\text{Au}(\text{ac})_3$  was dissolved in 100 mL ultrapure water to get 0.01% aqueous  $\text{Au}(\text{ac})_3$  solution.  $\text{Au}(\text{ac})_3$  and  $\text{AgNO}_3$  were mixed together in 2 mL ultrapure water. In a total ion concentration of  $4 \times 10^{-4}$  mol/L, the gold mole fractions of added metal ions ( $\chi_{\text{Au}}$ ) were 0, 0.25, 0.5, 0.75 and 1 respectively. Then certain amounts of NADPH were added to the solution. The amounts of NADPH were listed as following:

|                    |     |      |     |      |     |
|--------------------|-----|------|-----|------|-----|
| $\chi_{\text{Au}}$ | 0   | 0.25 | 0.5 | 0.75 | 1   |
| NADPH (mg)         | 0.5 | 0.75 | 1   | 1.25 | 1.5 |

The mixture was gently stirred for 24 h at room temperature. The products were purified using an Amicon centrifugal filter unit (molecular-weight cut-off (MWCO) =10 kDa) and then dispersed in water. The alloy nanoparticles were freeze-dried to obtain the powder for further characterization.

Characterization Methods: The transmission-electron-microscopy (TEM) images were obtained using a JEOL JEM-1230 transmission electron microscope at 100 kV. Samples for TEM were prepared by dropping 5  $\mu\text{L}$  of a solution of the Au clusters onto a Formvar coated copper grid and allowing it to dry. High resolution Transmission electron microscopy (HRTEM) images were taken on JEOL JEM-2010FEF transmission microscopy at 200 kV. Samples for HRTEM were prepared on ultrathin-carbon-coated grids in the same way mentioned above. X-ray diffraction (XRD) data were recorded on Bruker AXS D8 advance X-ray diffractometer. Samples of AuNPs solution were dropped on the substrate and allowed to dry as a uniform thin film. The XPS data were recorded using a Kratos XSAM 800 X-ray photoelectron spectrometer. The binding energy of the XPS data was referenced to the C 1s of aliphatic carbon at 284.8 eV. The FTIR spectra were recorded using a Nicolet Nexus 670 infrared spectrometer.

### 2. Supporting Figures

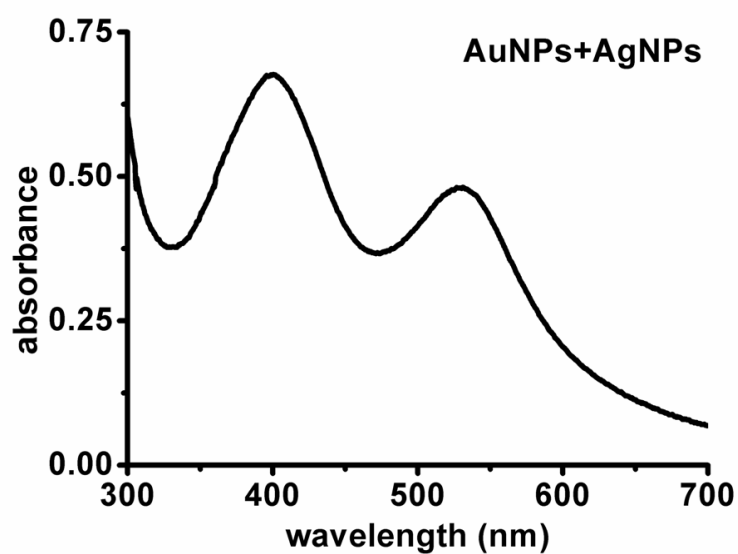

**Fig. S1** UV-vis spectrum of mixture solution of AuNPs and AgNPs in equimolar amounts.

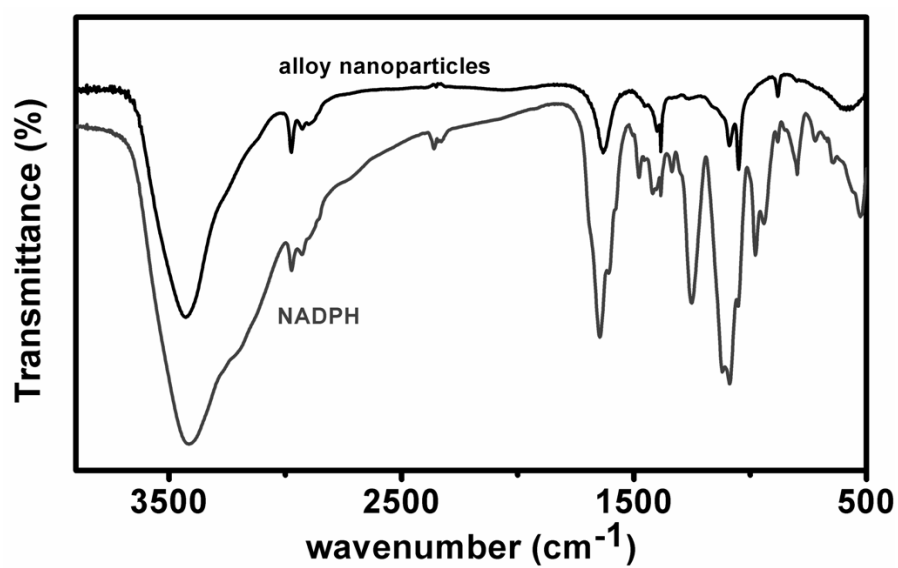

**Fig. S2** Infrared spectra of pure NADPH and Au-Ag alloy nanoparticles ( $\chi_{Au} = 0.5$ ).

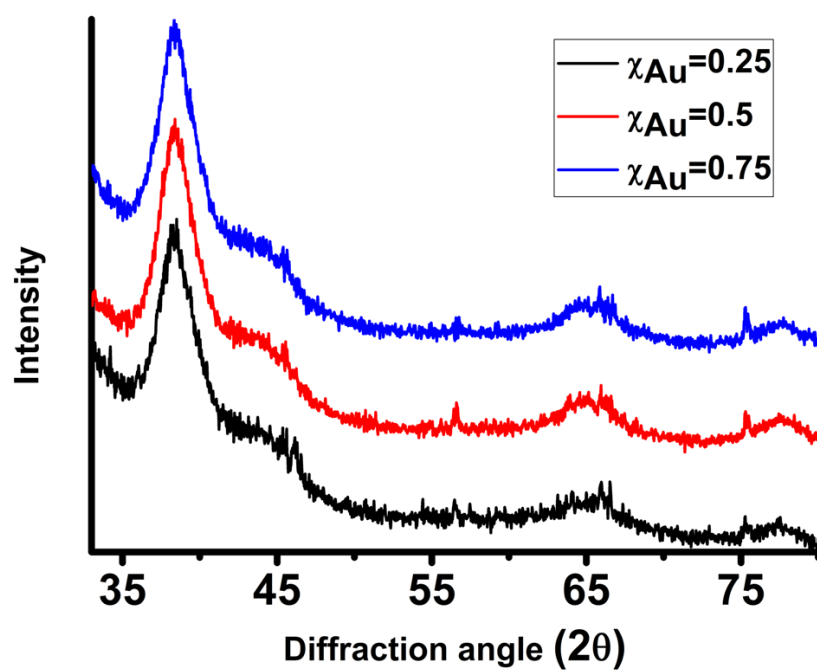

**Fig. S3.** XRD patterns of Au-Ag alloy nanoparticles on glass substrates.

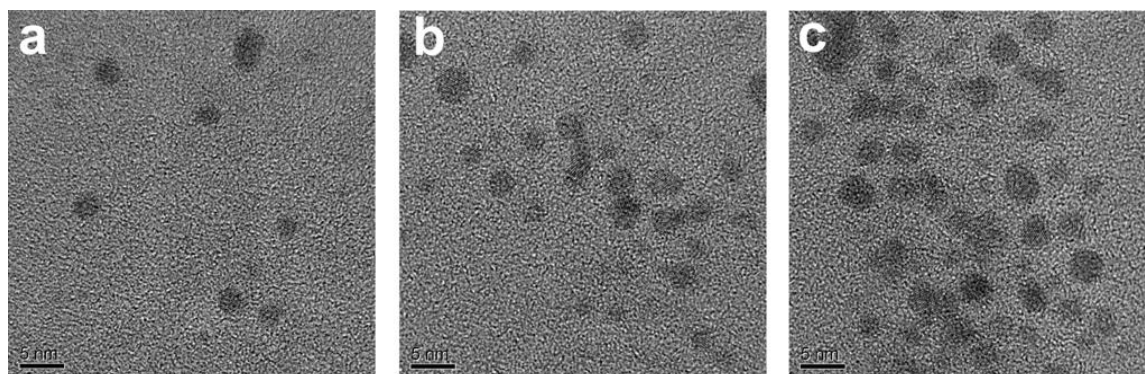

**Fig. S4.** High resolution TEM image of Au-Ag alloy nanoparticles. (a)  $\chi_{Au}=0.25$ , (b)  $\chi_{Au}=0.5$ , (c)  $\chi_{Au}=0.75$ .
